# Supplementary material for: Prior antibiotics and risk of antibiotic-resistant community-acquired urinary tract infection: a case–control study
Source: Oxford University Press journal article supplement (doi:10.1093/jac/dkm141), 2007-05-30
Supplement: dkm141_Supplementary_Data.zip [file dkm141_Supplementary_Data.zip]

## Supplementary data

**Table S1.** Use of antibiotics in previous year and risk of resistance in *E. coli* UTIs

| Antibiotic prescribed in previous year                    | Ampicillin resistance          |                               |                   | Trimethoprim resistance        |                               |                    |
|-----------------------------------------------------------|--------------------------------|-------------------------------|-------------------|--------------------------------|-------------------------------|--------------------|
|                                                           | yes<br>(resistant/susceptible) | no<br>(resistant/susceptible) | OR (95% CI)       | yes<br>(resistant/susceptible) | no<br>(resistant/susceptible) | OR (95% CI)        |
| Amoxicillin                                               | 109/100                        | 250/389                       | 1.70 (1.24, 2.32) | 43/100                         | 111/389                       | 1.51 (0.995, 2.28) |
| Trimethoprim                                              | 87/103                         | 272/386                       | 1.20 (0.87, 1.66) | 60/103                         | 94/386                        | 2.39 (1.62, 3.53)  |
| Augmentin                                                 | 32/29                          | 327/460                       | 1.55 (0.92, 2.62) | 13/29                          | 141/460                       | 1.46 (0.74, 2.89)  |
| Cephalosporins                                            | 40/29                          | 319/460                       | 1.99 (1.21, 3.28) | 18/29                          | 136/460                       | 2.10 (1.13, 3.90)  |
| Flucloxacillin                                            | 25/29                          | 334/460                       | 1.19 (0.68, 2.06) | 11/29                          | 143/460                       | 1.22 (0.60, 2.50)  |
| Penicillin                                                | 18/18                          | 341/471                       | 1.38 (0.71, 2.69) | 8/18                           | 146/471                       | 1.43 (0.61, 3.37)  |
| $\beta$ -Lactams                                          | 157/160                        | 202/329                       | 1.60 (1.21, 2.12) | 62/160                         | 92/329                        | 1.39 (0.95, 2.01)  |
| $\beta$ -Lactams excluding amoxicillin and cephalosporins | 62/67                          | 297/422                       | 1.32 (0.90, 1.92) | 25/67                          | 129/422                       | 1.22 (0.74, 2.01)  |
| Any                                                       | 209/260                        | 150/229                       | 1.23 (0.93, 1.62) | 94/260                         | 60/229                        | 1.38 (0.95, 2.00)  |

**Table S2.** Demographic and medical factors in patients with resistant compared with susceptible *E. coli* UTIs

| Potential confounders  |                | Amoxicillin                                 |                                            |      |           | Trimethoprim                                |                                            |      |           |
|------------------------|----------------|---------------------------------------------|--------------------------------------------|------|-----------|---------------------------------------------|--------------------------------------------|------|-----------|
| Variable               |                | risk factor present (resistant/susceptible) | risk factor absent (resistant/susceptible) | OR   | 95% CI    | risk factor present (resistant/susceptible) | risk factor absent (resistant/susceptible) | OR   | 95% CI    |
| Age                    | 0-4            | 11/10                                       |                                            | 1.43 | 0.58-3.50 | 5/10                                        |                                            | 1.60 | 0.52-4.99 |
|                        | 5-15           | 13/30                                       |                                            | 0.56 | 0.28-1.14 | 5/30                                        |                                            | 0.54 | 0.19-1.47 |
|                        | 16-24          | 39/33                                       |                                            | 1.53 | 0.90-2.62 | 20/33                                       |                                            | 1.95 | 1.00-3.78 |
|                        | 25-44          | 94/122                                      | ref                                        |      |           | 38/122                                      | ref                                        |      |           |
|                        | 45-64          | 102/148                                     |                                            | 0.89 | 0.62-1.29 | 53/148                                      |                                            | 1.15 | 0.71-1.86 |
|                        | 65-84          | 100/150                                     |                                            | 0.87 | 0.60-1.25 | 34/150                                      |                                            | 0.73 | 0.43-1.22 |
|                        | 85+            | 10/9                                        |                                            | 1.44 | 0.56-3.69 | 6/9                                         |                                            | 2.14 | 0.72-6.40 |
| Gender                 | male           | 32/50                                       | 337/452                                    | 0.86 | 0.54-1.37 | 13/50                                       | 148/452                                    | 0.79 | 0.42-1.50 |
| Social Class           | 1              | 7/9                                         |                                            | 0.86 | 0.31-2.37 | 8/9                                         |                                            | 2.35 | 0.86-6.42 |
|                        | 2              | 88/135                                      |                                            | 0.72 | 0.50-1.03 | 47/135                                      |                                            | 0.92 | 0.58-1.46 |
|                        | 3 non-manual   | 120/132                                     | ref                                        |      |           | 50/132                                      | ref                                        |      |           |
|                        | 3 manual       | 34/67                                       |                                            | 0.56 | 0.35-0.90 | 6/67                                        |                                            | 0.24 | 0.10-0.58 |
|                        | 4              | 57/82                                       |                                            | 0.76 | 0.50-1.16 | 20/82                                       |                                            | 0.64 | 0.36-1.16 |
|                        | 5              | 21/24                                       |                                            | 0.96 | 0.51-1.82 | 11/24                                       |                                            | 1.21 | 0.55-2.65 |
|                        | never employed | 19/14                                       |                                            | 1.49 | 0.72-3.11 | 9/14                                        |                                            | 1.70 | 0.69-4.17 |
|                        | child          | 23/39                                       |                                            | 0.65 | 0.37-1.15 | 10/39                                       |                                            | 0.68 | 0.31-1.46 |
| Any previous infection | summary score  | 250/340                                     | 116/160                                    | 1.01 | 0.76-1.36 | 99/340                                      | 61/160                                     | 0.76 | 0.53-1.11 |
| Previous UTI           | yes/no         | 266/368                                     | 96/126                                     | 0.95 | 0.70-1.29 | 119/368                                     | 38/126                                     | 1.07 | 0.71-1.63 |
| Catheter               | yes/no         | 81/99                                       | 278/395                                    | 1.16 | 0.84-1.62 | 44/99                                       | 113/395                                    | 1.55 | 1.03-2.35 |
| HRT                    | yes/no         | 64/92                                       | 255/326                                    | 0.89 | 0.62-1.27 | 27/92                                       | 113/326                                    | 0.85 | 0.52-1.37 |
| Op on bladder          | yes/no         | 40/36                                       | 325/460                                    | 1.57 | 0.98-2.52 | 22/36                                       | 137/460                                    | 2.05 | 1.17-3.60 |
| Op on bowel            | yes/no         | 16/17                                       | 350/483                                    | 1.30 | 0.65-2.61 | 8/17                                        | 152/483                                    | 1.50 | 0.63-3.53 |
| <b>Morbidities</b>     |                |                                             |                                            |      |           |                                             |                                            |      |           |
| Malignancy             | yes/no         | 20/31                                       | 349/471                                    | 0.87 | 0.49-1.55 | 12/31                                       | 149/471                                    | 1.22 | 0.61-2.44 |
| Mental/behaviour       | yes/no         | 36/51                                       | 333/451                                    | 0.96 | 0.61-1.50 | 15/51                                       | 146/451                                    | 0.91 | 0.50-1.66 |
| Respiratory            | yes/no         | 54/70                                       | 315/432                                    | 1.06 | 0.72-1.55 | 22/70                                       | 139/432                                    | 0.98 | 0.58-1.64 |
| Skin problem           | yes/no         | 13/24                                       | 356/478                                    | 0.73 | 0.36-1.45 | 4/24                                        | 157/478                                    | 0.51 | 0.17-1.48 |
| Endocrine              | yes/no         | 67/95                                       | 302/407                                    | 0.95 | 0.67-1.34 | 27/95                                       | 134/407                                    | 0.86 | 0.54-1.38 |
| Circulatory            | yes/no         | 98/142                                      | 271/360                                    | 0.92 | 0.68-1.24 | 37/142                                      | 124/360                                    | 0.76 | 0.50-1.15 |
| Musculo-skeletal       | yes/no         | 73/114                                      | 296/388                                    | 0.84 | 0.60-1.17 | 39/114                                      | 122/388                                    | 1.09 | 0.72-1.65 |
| Bowel problem          | yes/no         | 27/38                                       | 342/464                                    | 0.96 | 0.58-1.61 | 12/38                                       | 149/464                                    | 0.98 | 0.50-1.93 |
| Genitourinary problem  | yes/no         | 3/5                                         | 366/497                                    | 0.82 | 0.19-3.43 | 2/5                                         | 159/497                                    | 1.25 | 0.24-6.51 |
| Autoimmune disease     | yes/no         | 48/70                                       | 321/432                                    | 0.92 | 0.62-1.37 | 26/70                                       | 135/432                                    | 1.19 | 0.73-1.94 |
| Hypothyroid            | yes/no         | 19/33                                       | 350/469                                    | 0.77 | 0.43-1.38 | 9/33                                        | 152/469                                    | 0.84 | 0.39-1.80 |
| COPD                   | yes/no         | 0/2                                         | 369/500                                    | -    | -         | 0/2                                         | 161/500                                    | -    | -         |

**Table S3.** Exposure to antibiotics from sources other than direct consumption in patients with resistant compared with susceptible *E. coli* UTIs

| Potential confounders                                            |               | Amoxicillin                                 |                                            |      |           | Trimethoprim                                |                                            |      |           |
|------------------------------------------------------------------|---------------|---------------------------------------------|--------------------------------------------|------|-----------|---------------------------------------------|--------------------------------------------|------|-----------|
| Variable                                                         |               | risk factor present (resistant/susceptible) | risk factor absent (resistant/susceptible) | OR   | 95% CI    | risk factor present (resistant/susceptible) | risk factor absent (resistant/susceptible) | OR   | 95% CI    |
| Exposure to antibiotics in work                                  | yes/no        | 35/35                                       | 291/408                                    | 1.40 | 0.86-2.30 | 19/35                                       | 123/408                                    | 1.80 | 0.99-3.26 |
| Exposure to long-term antibiotics (4 weeks or longer)            | yes/no        | 62/59                                       | 295/426                                    | 1.52 | 1.03-2.23 | 33/59                                       | 120/426                                    | 1.99 | 1.24-3.18 |
| Attitude to antibiotics                                          | low           | 67/90                                       | 249/342                                    | 1.02 | 0.72-1.46 | 27/90                                       | 110/342                                    | 0.93 | 0.58-1.51 |
|                                                                  | medium        | ref                                         |                                            |      |           | 110/342                                     | ref                                        |      |           |
|                                                                  | high          | 22/31                                       | 249/342                                    | 0.97 | 0.55-1.72 | 11/31                                       | 110/342                                    | 1.10 | 0.54-2.27 |
| Antibiotic prescribed for household member in previous 12 months | yes/no        | 55/67                                       | 169/224                                    | 1.09 | 0.72-1.64 | 2/21                                        | 94/270                                     | 0.27 | 0.06-1.19 |
| Number of household members                                      | 0             | 71/107                                      | ref                                        |      |           | 32/107                                      | ref                                        |      |           |
|                                                                  | 1-3           | 261/340                                     |                                            | 1.16 | 0.82-1.63 | 114/340                                     |                                            | 1.12 | 0.72-1.76 |
|                                                                  | 4+            | 37/55                                       |                                            | 1.01 | 0.61-1.69 | 15/55                                       |                                            | 0.91 | 0.45-1.82 |
| Household infectious illness                                     | yes/no        | 96/143                                      | 196/241                                    | 0.82 | 0.60-1.14 | 38/143                                      | 93/241                                     | 0.69 | 0.46-1.06 |
| Visit any hotspots of infection                                  | summary score | 237/338                                     | 127/160                                    | 0.88 | 0.66-1.18 | 106/338                                     | 52/160                                     | 0.96 | 0.66-1.41 |

**Table S4.** Studies of individuals relating previous antibiotic use to resistant infections (January 2001 to week 26 of 2005). For original systematic review of studies published prior to these dates please see: Hillier SL, Magee JT, Howard AJ *et al.* How strong is the evidence that antibiotic use is a risk factor for antibiotic-resistance, community-acquired urinary tract infection? *J Antimicrob Chemother* 2002; **50**: 241-7.

| Study                     | Methods                                         | Time period                   | Population                                                                                                  | Inclusion criteria                                         | Number in study                                       | Antibiotic prescribed                                                                                                     | Antibiotic resistance                                                                                                     | Time period of previous antibiotic                 | Organism                                                                                                | Results                                                     |
|---------------------------|-------------------------------------------------|-------------------------------|-------------------------------------------------------------------------------------------------------------|------------------------------------------------------------|-------------------------------------------------------|---------------------------------------------------------------------------------------------------------------------------|---------------------------------------------------------------------------------------------------------------------------|----------------------------------------------------|---------------------------------------------------------------------------------------------------------|-------------------------------------------------------------|
| Steinke, 2001 (12)        | nested case-control using record linkage        | 18 months (7/93-12/95)        | resident in Tayside, Scotland, registered with general practitioner and submitted urine sample              | incident urine sample with bacterial growth                | 3435 subjects                                         | trimethoprim<br>other antibiotic                                                                                          | trimethoprim                                                                                                              | 6 months – excluding previous 3 days               | coliform bacilli. <i>E. coli</i> , <i>Klebsiella</i> spp., <i>Proteus</i> spp., <i>Pseudomonas</i> spp. | trimethoprim adjusted OR 4.35 (95% CI 3.03-5.73)            |
| Brown, 2002 (13)          | retrospective cohort                            | 6 years 7 months (9/92-4/99)  | women aged 18-65 years seen at a university health centre and primary care clinics in southeastern Michigan | acute uncomplicated UTI and positive urine culture         | 601 <i>E. coli</i> isolates (three different cohorts) | any antibiotic                                                                                                            | SXT                                                                                                                       | 2 weeks – excluding previous 1 day                 | <i>E. coli</i>                                                                                          | SXT OR 16.74 (95% CI 2.90-96.95)                            |
| Leflon-Guibout, 2002 (14) | case-series                                     | 4 months (11/97-2/98)         | patients hospitalized in A. Paré Hospital, France                                                           | diagnosed <i>E. coli</i> lower UTI                         | 106 patients                                          | co-amoxiclav                                                                                                              | co-amoxiclav                                                                                                              | 1 month                                            | <i>E. coli</i>                                                                                          | co-amoxiclav RR 4.36 (95% CI 1.97-9.65)                     |
| Metlay, 2003 (15)         | retrospective case-control using record linkage | 3 years 6 months (7/96-12/99) | veterans presenting to ambulatory care clinics within the VA Medical Centre, Philadelphia                   | growth from a urine specimen for a Gram-negative bacterium | 393 patients                                          | any antibiotic                                                                                                            | SXT                                                                                                                       | 6 months – excluding 2 weeks previous to infection | Gram-negative bacterium                                                                                 | SXT OR 4.1 (95% CI 2.2-7.5)                                 |
| Alos, 2005 (16)           | case-series                                     | 11 months (3/02-1/03)         | patients presenting to emergency service of Hospital de Mostoles (Madrid)                                   | <i>E. coli</i> community-acquired UTI                      | 164 patients                                          | ampicillin, gentamicin, fosfomycin, nitrofurantoin, cefazolin, nalidixic acid, norfloxacin, ciprofloxacin, co-trimoxazole | ampicillin, gentamicin, fosfomycin, nitrofurantoin, cefazolin, nalidixic acid, norfloxacin, ciprofloxacin, co-trimoxazole | 3 months                                           | <i>E. coli</i>                                                                                          | nalidixic acid ( $P<0.001$ ) and fluoroquinolones $P$ 0.011 |
| Donnan, 2004 (17)         | repeated cross-sectional using record linkage   | 24 months (01/95-12/96)       | 166000 patients registered with 28 practices in Ninewells Hospital lab catchment area, Tayside              | midstream urine specimens with Gram-negative bacteria      | 8833                                                  | trimethoprim, other antibiotic                                                                                            | trimethoprim                                                                                                              | 6 months                                           | Gram-negative bacteria                                                                                  | trimethoprim 1.22 (95% CI 1.16-1.28)                        |
| Killgore, 2004 (18)       | retrospective case-control                      | 12 months (01/01-12/01)       | patients presenting to outpatient or emergency clinic of University of California, San Francisco            | community-acquired UTI due to ciprofloxacin-resistant UTI  | 40 cases and 80 controls                              | any antibiotic                                                                                                            | ciprofloxacin                                                                                                             | 4 weeks                                            | <i>E. coli</i>                                                                                          | any quinolone OR 30.3 (95% CI 5.82-158.42)                  |

SXT, trimethoprim/sulfamethoxazole.
